# Supplementary material for: Optimization of Three Extraction Methods and Their Effect on the Structure and Antioxidant Activity of Polysaccharides in Dendrobium huoshanense
Source: MDPI journal article supplement (doi:10.3390/molecules28248019), 2023-12-08
Supplement: s1 [file s1]

## Article

# Optimization of Three Extraction Methods and Their Effect on the Structure and Antioxidant Activity of Polysaccharides in *Dendrobium huoshanense*

Hua Zhu <sup>1</sup>, Xin Yi <sup>1</sup>, Si-Si Jia <sup>1</sup>, Chun-Yao Liu <sup>1</sup>, Zi-Wei Han <sup>1</sup>, Bang-Xing Han <sup>2</sup>, Gong-Cheng Jiang <sup>3</sup>, Zheng-Feng Ding <sup>3</sup>, Ren-Lei Wang <sup>3,\*</sup> and Guang-Ping Lv <sup>1,\*</sup>

<sup>1</sup> School of Food and Pharmaceutical Engineering, Nanjing Normal University, Nanjing 210046, China; wfzh8233@163.com (H.Z.); 212702035@njnu.edu.cn (X.Y.); 18835540923@163.com (S.-S.J.); wissingni@163.com (C.-Y.L.); hinziwei@163.com (Z.-W.H.)

<sup>2</sup> College of Biological and Pharmaceutical Engineering, West Anhui University, Lu'an 237012, China; hanbx1978@wxc.edu.cn

<sup>3</sup> Key Laboratory of Biological Functional Molecules of Jiangsu Province, College of Life Science and Chemistry, Jiangsu Second Normal University, Nanjing 211200, China; ji680103@163.com (G.-C.J.); ding@jssnu.edu.cn (Z.-F.D.)

\* Correspondence: wr1@jssnu.edu.cn (R.-L.W.); guangpinglyu@njnu.edu.cn (G.-P.L.)

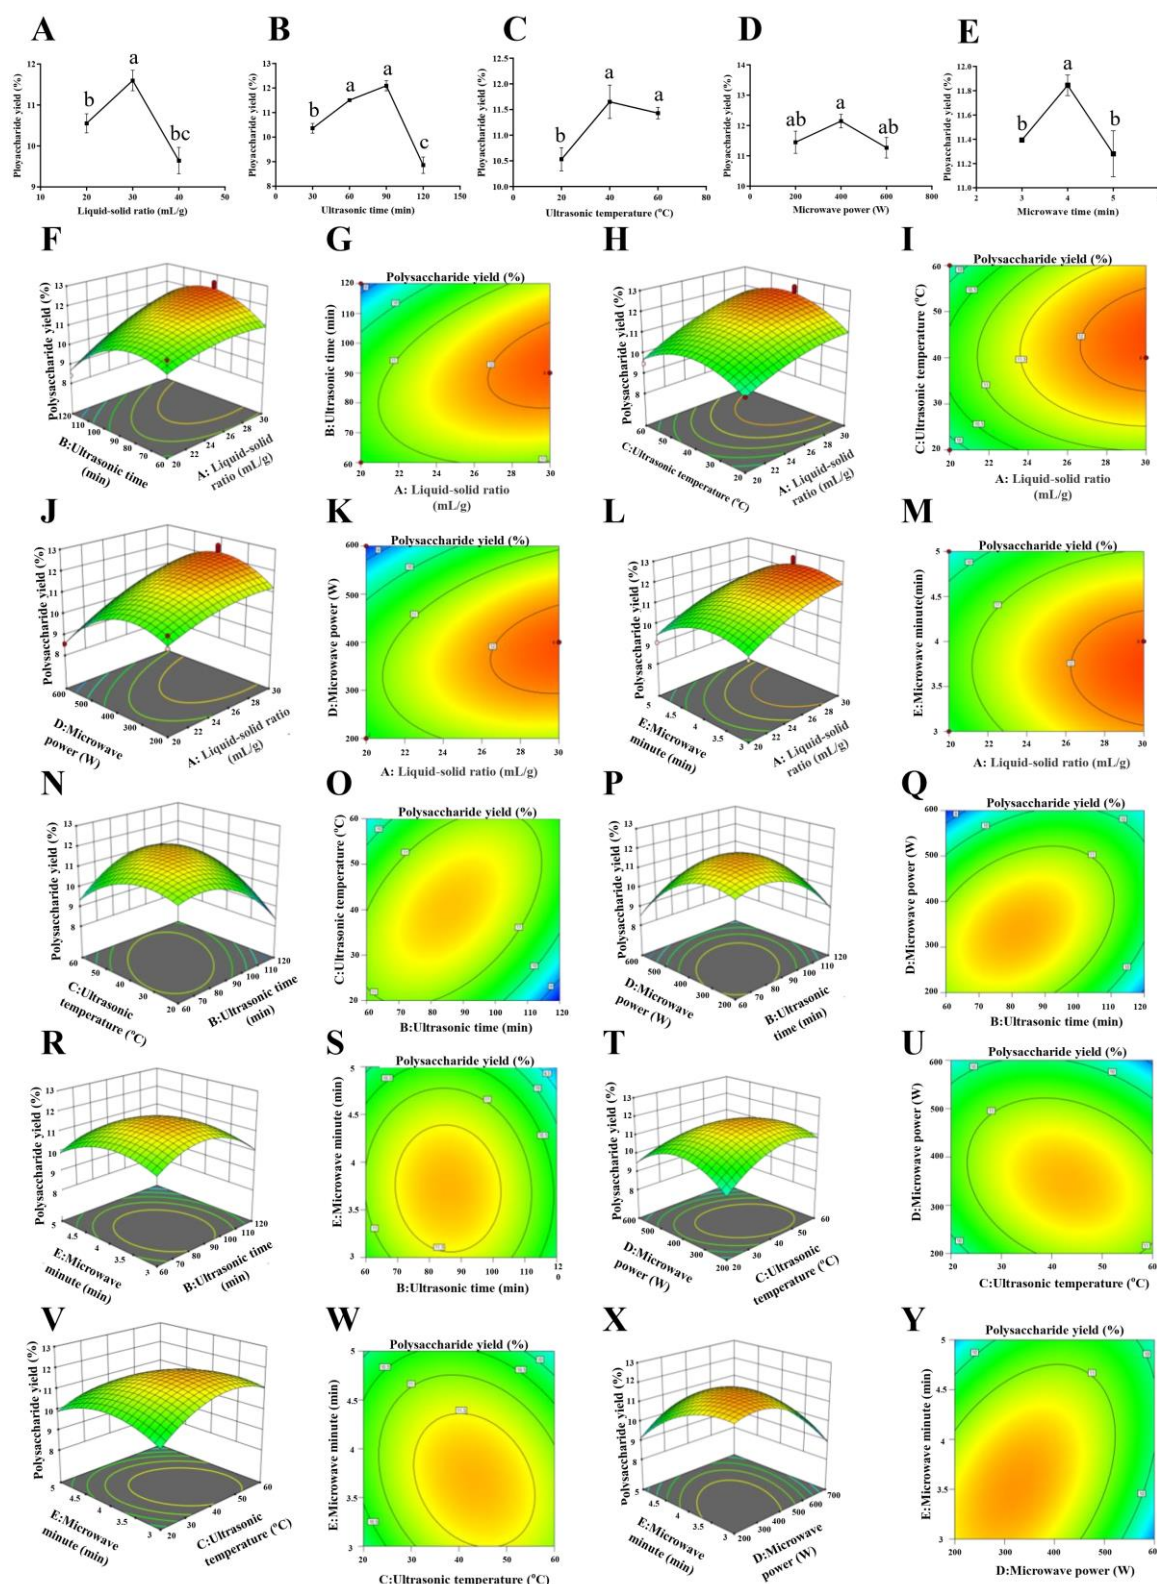

**Figure S1.** Effect of different (A) liquid-solid ration, (B) extraction time, (C) extraction temperature, (D) microwave power and (E) microwave minute on the yield of polysaccharides by UMAE. Response surfaces plots (F, H, J, L, N, P, R, T, V and X) and contour plots (G, I, K, M, O, Q, S, U, W and Y) showing the effects of liquid-solid ration, extraction time, extraction temperature, microwave power and microwave minute on the yield of polysaccharides by UMAE. Significant ( $p < 0.05$ ) differences are shown by data bearing different letters (a–c).

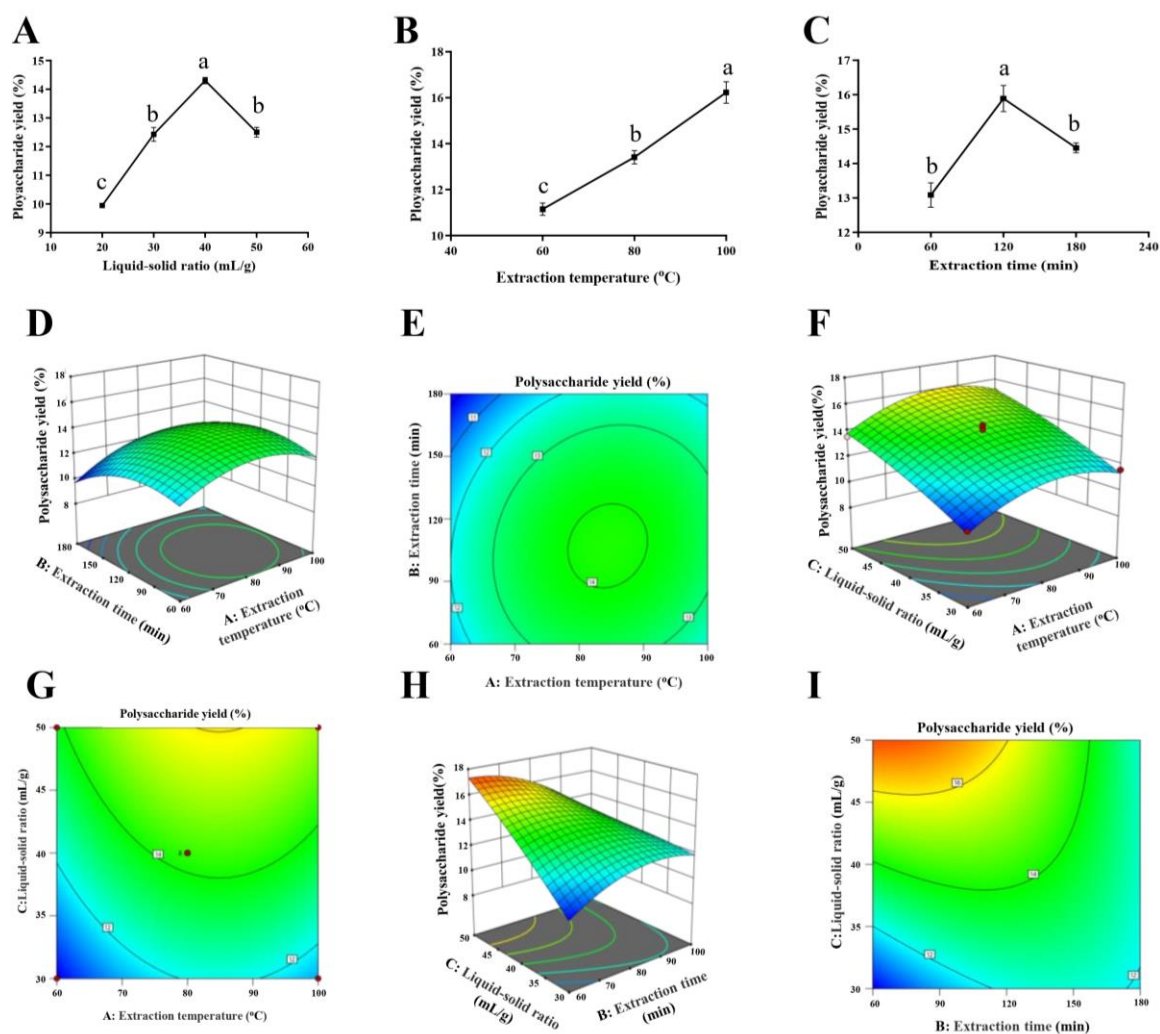

**Figure S2.** Effect of different (A) extraction temperature, (B) extraction time and (C) liquid-solid ration on the yield of polysaccharides by HAE. Response surfaces plots (D, F and H) and contour plots (E, G and I) showing the effects of extraction temperature, extraction time and liquid-solid ratio on the yield of polysaccharides by HAE. Significant ( $p < 0.05$ ) differences are shown by data bearing different letters (a–c).

**Table S1** Experimental design for independent variables and the response of the extraction yield of UMAE in Box-Behnken design.

| Run | Coded variables |    |    |    |    | Uncoded variable               |                          |                                |                         |                            | Response |
|-----|-----------------|----|----|----|----|--------------------------------|--------------------------|--------------------------------|-------------------------|----------------------------|----------|
|     | A               | B  | C  | D  | E  | A (Liquid–solid ratio, (mL/g)) | B (Ultrasonic time, min) | C (Ultrasonic temperature, °C) | D (Micro-wave power, W) | E (Micro-wave minute, min) |          |
| 1   | -1              | 1  | 0  | 0  | 0  | 20:1                           | 120                      | 40                             | 400                     | 4                          | 8.42     |
| 2   | 0               | 1  | -1 | 0  | 0  | 30:1                           | 120                      | 20                             | 400                     | 4                          | 9.24     |
| 3   | 0               | 0  | 0  | 1  | 1  | 30:1                           | 90                       | 40                             | 600                     | 5                          | 10.16    |
| 4   | -1              | -1 | 0  | 0  | 0  | 20:1                           | 60                       | 40                             | 400                     | 4                          | 11       |
| 5   | 0               | 0  | -1 | 0  | 1  | 30:1                           | 90                       | 20                             | 400                     | 5                          | 10.29    |
| 6   | 0               | 1  | 0  | -1 | 0  | 30:1                           | 120                      | 40                             | 200                     | 4                          | 9.66     |
| 7   | 0               | -1 | 1  | 0  | 0  | 30:1                           | 60                       | 60                             | 400                     | 4                          | 8.92     |
| 8   | 0               | -1 | 0  | 0  | 1  | 30:1                           | 60                       | 40                             | 400                     | 5                          | 9.74     |
| 9   | 0               | 0  | 0  | 0  | 0  | 30:1                           | 90                       | 40                             | 400                     | 4                          | 11.79    |
| 10  | 0               | 0  | 0  | 1  | -1 | 30:1                           | 90                       | 40                             | 600                     | 3                          | 9.66     |
| 11  | 0               | 0  | 1  | 0  | 0  | 40:1                           | 90                       | 60                             | 400                     | 4                          | 10.86    |
| 12  | 0               | -1 | 0  | 0  | -1 | 30:1                           | 60                       | 40                             | 400                     | 3                          | 10.03    |
| 13  | 0               | 1  | 0  | 0  | -1 | 30:1                           | 120                      | 40                             | 400                     | 3                          | 11.42    |
| 14  | 0               | 0  | 0  | 0  | 0  | 30:1                           | 90                       | 40                             | 400                     | 4                          | 12.32    |
| 15  | 0               | 1  | 0  | 1  | 0  | 30:1                           | 120                      | 40                             | 600                     | 4                          | 10.77    |
| 16  | 0               | 0  | 0  | 0  | -1 | 40:1                           | 90                       | 40                             | 400                     | 3                          | 11.4     |
| 17  | 0               | 0  | 0  | -1 | 1  | 30:1                           | 90                       | 40                             | 200                     | 5                          | 8.64     |
| 18  | 0               | 0  | 1  | -1 | 0  | 30:1                           | 90                       | 60                             | 200                     | 4                          | 11.62    |
| 19  | 0               | -1 | 0  | -1 | 0  | 30:1                           | 60                       | 40                             | 200                     | 4                          | 10.81    |
| 20  | 0               | -1 | 0  | 0  | 0  | 40:1                           | 60                       | 40                             | 400                     | 4                          | 9.18     |
| 21  | 0               | 0  | -1 | 0  | -1 | 30:1                           | 90                       | 20                             | 400                     | 3                          | 10.79    |
| 22  | 0               | 0  | 0  | -1 | -1 | 30:1                           | 90                       | 40                             | 200                     | 3                          | 11.32    |
| 23  | 0               | -1 | -1 | 0  | 0  | 30:1                           | 60                       | 20                             | 400                     | 4                          | 10.66    |
| 24  | 0               | 0  | -1 | -1 | 0  | 30:1                           | 90                       | 20                             | 200                     | 4                          | 9.43     |
| 25  | 0               | 1  | 0  | 0  | 1  | 30:1                           | 120                      | 40                             | 400                     | 5                          | 10.75    |

---

|    |    |    |    |    |    |      |     |    |     |   |       |
|----|----|----|----|----|----|------|-----|----|-----|---|-------|
| 26 | 0  | 0  | 1  | 0  | 1  | 30:1 | 90  | 60 | 400 | 5 | 10.51 |
| 27 | -1 | 0  | -1 | 0  | 0  | 20:1 | 90  | 20 | 400 | 4 | 9.79  |
| 28 | -1 | 0  | 0  | 0  | 1  | 20:1 | 90  | 40 | 400 | 5 | 9.07  |
| 29 | 0  | 0  | 0  | 0  | 0  | 30:1 | 90  | 40 | 400 | 4 | 12.5  |
| 30 | 0  | 1  | 0  | 0  | 0  | 40:1 | 120 | 40 | 400 | 4 | 10.74 |
| 31 | 0  | 0  | 1  | 1  | 0  | 30:1 | 90  | 60 | 600 | 4 | 10.22 |
| 32 | 0  | 0  | 0  | 0  | 1  | 40:1 | 90  | 40 | 400 | 5 | 10.25 |
| 33 | 0  | 0  | -1 | 1  | 0  | 30:1 | 90  | 20 | 600 | 4 | 9.93  |
| 34 | -1 | 0  | 0  | 0  | -1 | 20:1 | 90  | 40 | 400 | 3 | 10.09 |
| 35 | 0  | 0  | -1 | 0  | 0  | 40:1 | 90  | 20 | 400 | 4 | 9.66  |
| 36 | -1 | 0  | 1  | 0  | 0  | 20:1 | 90  | 60 | 400 | 4 | 9.49  |
| 37 | -1 | 0  | 0  | -1 | 0  | 20:1 | 90  | 40 | 200 | 4 | 10.22 |
| 38 | 0  | -1 | 0  | 1  | 0  | 30:1 | 60  | 40 | 600 | 4 | 9.09  |
| 39 | 0  | 0  | 0  | -1 | 0  | 40:1 | 90  | 40 | 200 | 4 | 9.7   |
| 40 | -1 | 0  | 0  | 1  | 0  | 20:1 | 90  | 40 | 600 | 4 | 8.56  |
| 41 | 0  | 0  | 0  | 0  | 0  | 30:1 | 90  | 40 | 400 | 4 | 12.39 |
| 42 | 0  | 1  | 1  | 0  | 0  | 30:1 | 120 | 60 | 400 | 4 | 11.52 |
| 43 | 0  | 0  | 0  | 0  | 0  | 30:1 | 90  | 40 | 400 | 4 | 11.88 |
| 44 | 0  | 0  | 0  | 1  | 0  | 40:1 | 90  | 40 | 600 | 4 | 10.48 |
| 45 | 0  | 0  | 0  | 0  | 0  | 30:1 | 90  | 40 | 400 | 4 | 12.57 |
| 46 | 0  | 0  | 1  | 0  | -1 | 30:1 | 90  | 60 | 400 | 3 | 12.19 |
| 47 | -1 | 0  | 0  | -1 | 0  | 20:1 | 90  | 40 | 200 | 4 | 10.78 |
| 48 | 0  | 1  | 0  | 1  | 0  | 30:1 | 120 | 40 | 600 | 4 | 11.08 |
| 49 | 0  | 1  | 1  | 0  | 0  | 30:1 | 120 | 60 | 400 | 4 | 11.42 |
| 50 | 0  | 0  | -1 | 0  | -1 | 30:1 | 90  | 20 | 400 | 3 | 9.97  |

---

**Table S2** ANOVA for response surface quadratic model for the yield of UMAE.

| Source                   | Sum of squares | Df | Mean square                   | F-value  | p-Value                    |                 |
|--------------------------|----------------|----|-------------------------------|----------|----------------------------|-----------------|
| Model                    | 51.49576       | 20 | 2.574788                      | 13.65901 | 7.76E-10                   | significant     |
| A-Liquid-solid ratio     | 16.0156        | 1  | 16.0156                       | 84.96129 | 4.05E-10                   | ***             |
| B-Ultrasonic time        | 0.882579       | 1  | 0.882579                      | 4.681999 | 0.038857                   | *               |
| C-Ultrasonic temperature | 0.216094       | 1  | 0.216094                      | 1.146356 | 0.293144                   |                 |
| D-Microwave power        | 2.821115       | 1  | 2.821115                      | 14.96575 | 0.000571                   | ***             |
| E-Microwave minute       | 1.511223       | 1  | 1.511223                      | 8.016898 | 0.008336                   | **              |
| AB                       | 4.2849         | 1  | 4.2849                        | 22.731   | 4.84E-05                   | ***             |
| AC                       | 0.5625         | 1  | 0.5625                        | 2.98401  | 0.094728                   |                 |
| AD                       | 2.503331       | 1  | 2.503331                      | 13.27994 | 0.001041                   | **              |
| AE                       | 0.004225       | 1  | 0.004225                      | 0.022413 | 0.882029                   |                 |
| BC                       | 4.124853       | 1  | 4.124853                      | 21.88196 | 6.21E-05                   | ***             |
| BD                       | 2.932033       | 1  | 2.932033                      | 15.55416 | 0.000466                   | ***             |
| BE                       | 0.0361         | 1  | 0.0361                        | 0.191507 | 0.664907                   |                 |
| CD                       | 0.9025         | 1  | 0.9025                        | 4.787679 | 0.036869                   | *               |
| CE                       | 0.701478       | 1  | 0.701478                      | 3.721277 | 0.063561                   |                 |
| DE                       | 2.5281         | 1  | 2.5281                        | 13.41134 | 0.000993                   | ***             |
| A <sup>2</sup>           | 15.35217       | 1  | 15.35217                      | 81.44183 | 6.42E-10                   | ***             |
| B <sup>2</sup>           | 10.92444       | 1  | 10.92444                      | 57.95311 | 2.16E-08                   | ***             |
| C <sup>2</sup>           | 7.153454       | 1  | 7.153454                      | 37.94841 | 1.03E-06                   | ***             |
| D <sup>2</sup>           | 12.56768       | 1  | 12.56768                      | 66.67036 | 5.28E-09                   | ***             |
| E <sup>2</sup>           | 5.145611       | 1  | 5.145611                      | 27.29699 | 1.36E-05                   | ***             |
| Residual                 | 5.466637       | 29 | 0.188505                      |          |                            |                 |
| Lack of Fit              | 4.383104       | 20 | 0.219155                      | 1.820338 | 0.178664                   | not significant |
| Pure Error               | 1.083533       | 9  | 0.120393                      |          |                            |                 |
| Cor Total                | 56.96239       | 49 |                               |          |                            |                 |
| R <sup>2</sup>           | 0.9040         |    | R <sup>2</sup> <sub>Adj</sub> | 0.8378   |                            |                 |
| C.V.%                    | 4.1509         |    | Pred R-Squared                | 0.6803   | A <sub>deq</sub> Precision | 13.1120         |

\*  $p < 0.05$ ; \*\*  $p < 0.01$ ; \*\*\*  $p < 0.001$ .

**Table S3** Experimental design for independent variables and the response of the extraction yield of HWE in Box-Behnken design.

| Run | Coded variables |    |    | Uncoded variable               |                          |                              | Response |
|-----|-----------------|----|----|--------------------------------|--------------------------|------------------------------|----------|
|     | A               | B  | C  | A (Extraction temperature, °C) | B (Extraction time, min) | C (Liquid-solid ratio, mL/g) |          |
| 1   | -1              | 0  | 1  | 60                             | 120                      | 50:1                         | 13.54    |
| 2   | 0               | 1  | -1 | 80                             | 180                      | 30:1                         | 11.17    |
| 3   | -1              | 0  | -1 | 60                             | 120                      | 30:1                         | 10.08    |
| 4   | 1               | 0  | -1 | 100                            | 120                      | 30:1                         | 11.57    |
| 5   | 0               | 0  | 0  | 80                             | 120                      | 40:1                         | 14.71    |
| 6   | 0               | 0  | 0  | 80                             | 120                      | 40:1                         | 14.32    |
| 7   | 1               | 0  | 1  | 100                            | 120                      | 50:1                         | 15.03    |
| 8   | 0               | -1 | 1  | 80                             | 60                       | 50:1                         | 17.86    |
| 9   | 0               | 1  | 1  | 80                             | 180                      | 50:1                         | 12.05    |
| 10  | 0               | -1 | -1 | 80                             | 60                       | 30:1                         | 10.01    |
| 11  | 1               | 1  | 0  | 100                            | 180                      | 40:1                         | 12.03    |
| 12  | -1              | -1 | 0  | 60                             | 60                       | 40:1                         | 11.87    |
| 13  | 1               | -1 | 0  | 100                            | 60                       | 40:1                         | 12.59    |
| 14  | -1              | 1  | 0  | 60                             | 180                      | 40:1                         | 10.05    |
| 15  | 0               | 0  | 0  | 80                             | 120                      | 40:1                         | 14.52    |
| 16  | 0               | 0  | 0  | 80                             | 120                      | 40:1                         | 14.11    |
| 17  | 0               | 0  | 0  | 80                             | 120                      | 40:1                         | 14.6     |
| 18  | 0               | 0  | 0  | 80                             | 120                      | 40:1                         | 13.98    |
| 19  | 0               | 0  | 0  | 80                             | 120                      | 40:1                         | 14.34    |
| 20  | 0               | 0  | 0  | 80                             | 120                      | 40:1                         | 13.94    |

**Table S4** ANOVA for response surface quadratic model for the yield of HWE.

| Source            | Sum of squares | Df | Mean square                   | F-value              | p-Value                    |                 |
|-------------------|----------------|----|-------------------------------|----------------------|----------------------------|-----------------|
| Model             | 75.37          | 9  | 8.37                          | 51.12                | < 0.0001                   | significant     |
| A                 | 4.03           | 1  | 4.03                          | 24.62                | 0.0006                     | ***             |
| B                 | 6.18           | 1  | 6.18                          | 37.71                | 0.0001                     | ***             |
| C                 | 30.62          | 1  | 30.62                         | 186.88               | < 0.0001                   | ***             |
| AB                | 0.3969         | 1  | 0.3969                        | 2.42                 | 0.1506                     |                 |
| AC                | 0.0000         | 1  | 0                             | 0                    | 1                          |                 |
| BC                | 12.15          | 1  | 12.15                         | 74.14                | < 0.0001                   | ***             |
| A <sup>2</sup>    | 9.59           | 1  | 9.59                          | 58.57                | < 0.0001                   | ***             |
| B <sup>2</sup>    | 6.93           | 1  | 6.93                          | 42.3                 | < 0.0001                   | ***             |
| C <sup>2</sup>    | 0.4429         | 1  | 0.4429                        | 2.7                  | 0.1312                     |                 |
| Residual          | 1.64           | 10 | 0.1638                        |                      |                            |                 |
| Lack of fit       | 1.06           | 3  | 0.3545                        | 4.32                 | 0.0508                     | not significant |
| Pure error        | 0.5748         | 7  | 0.0821                        |                      |                            |                 |
| Correlation total | 77.01          | 19 |                               |                      |                            |                 |
| R <sup>2</sup>    | 0.9787         |    | R <sup>2</sup> <sub>Adj</sub> | 0.9599               |                            |                 |
| C.V.%             | 3.0853         |    | Pred R-Squared                | 0.9595820<br>6909385 | A <sub>deq</sub> Precision | 26.6202         |

\*\*\*p &lt; 0.001.
